# Supplementary material
Source: ML conference proceedings conference paper supplement (https://openreview.net/forum?id=FQEFWGT19m)
Supplement: supplementary_material [file attachment]

# MULTI-TASK LEARNING FOR HETEROGENEOUS MULTI-SOURCE BLOCK-WISE MISSING DATA

**Anonymous authors**

Paper under double-blind review

## ABSTRACT

Multi-task learning (MTL) has emerged as an imperative machine learning tool to solve multiple learning tasks simultaneously and has been successfully applied to healthcare, marketing, and biomedical fields. However, in order to borrow information across different tasks effectively, it is essential to utilize both homogeneous and heterogeneous information. Among the extensive literature on MTL, various forms of heterogeneity are presented in MTL problems, such as block-wise, distribution, and posterior heterogeneity. Existing methods, however, struggle to tackle these forms of heterogeneity simultaneously in a unified framework. In this paper, we propose a two-step learning strategy for MTL which addresses the aforementioned heterogeneity. First, we impute the missing blocks using shared representations extracted from homogeneous source across different tasks. Next, we disentangle the mappings between input features and responses into a shared component and a task-specific component, respectively, thereby enabling information borrowing through the shared component. Our numerical experiments and real-data analysis from the ADNI database demonstrate the superior MTL performance of the proposed method compared to a single task learning and other competing methods.

## 1 INTRODUCTION

**Motivation.** Many datasets for specific scientific tasks lack sufficient samples to train an accurate machine learning model. In recent decades, multi-task learning (MTL) has become a powerful tool to borrow information across related tasks for improved learning capacity. In addition, data collected for each task might come from multiple sources; for example, clinic notes, medical images, and lab tests are collected for medical diagnosis. The multi-source data brings richer information for each task, potentially enhancing the MTL. However, this also imposes several key challenges. First of all, it is common that observed data sources for each task are heterogeneous, so some blocks (certain data sources for certain tasks) could be entirely missing, termed as a block-wise missing structure in the literature. Second, even if the observed data sources are aligned across tasks, the distribution of the same data source could be heterogeneous, referred to as distribution heterogeneity. Furthermore, the associations between features and responses could vary due to distinct scientific goals or other factors, which we refer to as posterior heterogeneity. In the following, we provide concrete motivating examples to illustrate these challenges in different problems.

**Example 1: Medical multi-source datasets.** Multi-source data are widely observed in medical applications and offer more comprehensive information than single-source data. For example, the Alzheimer’s Disease Neuroimaging Initiative (ADNI) dataset includes medical imaging, biosamples, gene expression, and demographic information (Mueller et al., 2005a;b). However, entire blocks of data are often missing when certain sources become unnecessary or infeasible to collect due to known factors or patient conditions (Madden et al., 2016).

**Example 2: Single-cell multi-omics datasets.** Data from different experimental batches often exhibit distribution heterogeneity across various omics measurements. For instance, transcriptome data collected from different batches can display varying patterns due to differences in experimental conditions or technical variability (Cao et al., 2022a;b). In multi-omics datasets, sequencing data distributions also differ across various cancer types (Subramanian et al., 2020).

**Example 3: Combining randomized controlled trials (RCTs) and observational data.** Combining RCTs and observational data has become effective for deriving causal effects due to the high costs and limited participant numbers in RCTs (Colnet et al., 2024). However, RCTs and observational data often exhibit posterior heterogeneity (Li et al., 2024a); for instance, causal effects in RCTs may differ from associations in observational data due to the controlled conditions of RCTs (Imbens & Rubin, 2015).

**Challenges.** The challenge in MTL is to incorporate various forms of heterogeneity, each introducing a unique challenge. Block-wise heterogeneity complicates the integration of data as missing patterns vary across tasks, making it difficult to leverage shared information efficiently. For example, in the ADNI dataset, imaging features are present in all datasets, but genetic information is available only in specific subsets (Xue & Qu, 2021). In addition, distribution heterogeneity can also lead to biased or misleading scientific conclusions if not addressed properly. For instance, in multi-omics datasets, sequencing data vary significantly across different cancer types (Subramanian et al., 2020). Lastly, posterior heterogeneity affects the accuracy of predictions. For example, the relationships identified in RCTs often do not align with those observational data collected in real-life settings (Kent et al., 2018; 2020). While each type of heterogeneity imposes its own challenge, addressing all three challenges simultaneously under a unified framework presents significant obstacles, and to our best knowledge, current MTL methods are not equipped to handle these intricate dilemmas.

**Contributions.** In this work, we propose a unified MTL framework to address three types of heterogeneity in MTL. There are three key contributions: First, we propose a novel block-wise missing imputation method which effectively handles distribution heterogeneity by learning both shared and task-specific representations, uncovering complex structures between sources, and enabling better generalization during imputation. Second, we disentangle the associations between all input features and responses into shared and task-specific components, allowing for the effective integration of information while adapting to differences across tasks. Third, we propose an MTL architecture consisting of two parts to construct these associations. The first part builds heterogeneous feature spaces, while the second part learns responses, jointly addressing both distribution and posterior heterogeneity. We validate the proposed framework on synthetic and real-world datasets, demonstrating its superior performance in handling block-wise missing data and various levels of heterogeneity.

## 2 RELATED WORK

**Multi-source data integration.** Several related works on multi-source data collected for the same set of samples fall within the Joint and Individual Variation Explained (JIVE) framework. These methods are classified as unsupervised or supervised JIVE, depending on the presence of responses. Unsupervised JIVE and its variants learn joint, individual, and partially shared structures from multiple data matrices through low-rank approximations (Lock et al., 2013; Feng et al., 2018; Gaynanova & Li, 2019; Choi & Jung, 2022; Yi et al., 2023; James et al., 2024). Supervised JIVE, on the other hand, focuses on regression for multi-source data (Gao et al., 2021; Palzer et al., 2022; Zhang & Gaynanova, 2022; Wang & Lock, 2024). Similarly, factor models have been applied to multi-source data in a supervised setting (Shu et al., 2020; Li & Li, 2022; Anceschi et al., 2024). While these methods can effectively address distribution heterogeneity across different sources in linear settings, they are limited in scope, as they capture only simple data structures within a single task.

**Multi-source block-wise missing data integration.** Recently, several methods have been developed to address block-wise missing data. These methods can be divided into two categories based on whether imputation is involved. Imputation-based methods assume consistent correlations between different sources across datasets, allowing for the imputation of missing blocks (Gao & Lee, 2017; Xue & Qu, 2021; Xue et al., 2021; Zhou et al., 2021; Ouyang et al., 2024). For example, Xue & Qu (2021) and Xue et al. (2021) construct estimating equations using all available information and integrate informative estimating functions to achieve efficient estimators. On the other hand, non-imputation-based methods focus on learning the covariance matrices among predictors and between the response and predictors from the observed blocks (Yuan et al., 2012; Xiang et al., 2014; Yu et al., 2020; Li et al., 2024b). While these methods perform well in the absence of distribution shift and posterior shift, effectively utilizing all block-wise missing data, they struggle to handle distribution or posterior heterogeneity.

**Multi-task learning (MTL).** There is a growing literature on learning multiple tasks simultaneously with a shared model; see Zhang & Yang (2018); Crawshaw (2020); Zhang & Yang (2021) for reviews. Here, we primarily focus on MTL with deep neural networks, as these networks can capture more complex relationships. These methods can be broadly classified into four categories: The first category is balancing individual loss functions for different tasks, which is a common approach to ease multi-task optimization (Du et al., 2018; Gong et al., 2019; Hang et al., 2023; Wu et al., 2024). The second category involves regularization, especially in the form of hard parameter sharing (Subramanian et al., 2018; Liu et al., 2019; Maziarka et al., 2022) and soft parameter sharing (Ullrich et al., 2017; Lee et al., 2018; Han et al., 2024). The third category addresses the challenge of negative transfer, where explicit gradient modulation is used to alleviate conflicts in learning dynamics between tasks (Lopez-Paz & Ranzato, 2017; Chaudhry et al., 2018; Maninis et al., 2019; Abdollahzadeh et al., 2021; Hu et al., 2022; Wang et al., 2024). The fourth category uses knowledge distillation to transfer knowledge from single-task networks to a multi-task student network (Rusu et al., 2015; Teh et al., 2017; Clark et al., 2019; D’Eramo et al., 2024). Although MTL can integrate data from multiple tasks, it is limited in addressing different types of heterogeneity and is constrained by the assumption of a fully observed setting.

Most related work focuses on addressing a single challenge, such as posterior heterogeneity or the missing data problem, but typically fails to address all challenges simultaneously. In contrast, our proposed method extends these approaches by tackling both distribution and posterior heterogeneity in a block-wise missing setting. This enables a more comprehensive integration of data across tasks, resulting in improved performance in MTL.

### 3 TWO-STEP MTL FOR HETEROGENEOUS MULTI-SOURCE BLOCK-WISE MISSING DATA

**Notation.** We introduce the notations used in this paper. Vectors and matrices are denoted by  $\mathbf{x}$  and  $\mathbf{X}$ , respectively. The  $\ell_1$  and  $\ell_2$  norms of a vector  $\mathbf{x}$  are  $\|\mathbf{x}\|_1$  and  $\|\mathbf{x}\|_2$ , and the Frobenius norm of a matrix  $\mathbf{X}$  is  $\|\mathbf{X}\|_F$ . The symbol  $|$  represents concatenation. For example,  $[\mathbf{x}_1|\mathbf{x}_2]$  denotes concatenating a  $p_1 \times 1$  vector  $\mathbf{x}_1$  and a  $p_2 \times 1$  vector  $\mathbf{x}_2$  into a  $(p_1 + p_2) \times 1$  vector. Similarly,  $[\mathbf{X}_1|\mathbf{X}_2]$  denotes concatenating an  $n \times p_1$  matrix  $\mathbf{X}_1$  and an  $n \times p_2$  matrix  $\mathbf{X}_2$  into an  $n \times (p_1 + p_2)$  matrix. We define  $[r] = \{1, 2, \dots, r\}$  as the set of integers from 1 to  $r$ .

**Problem Description.** Suppose we have data from  $T$  tasks, with features collected from  $T + 1$  sources. For all tasks, we assume that a common source, called the anchoring source, is observed. Additionally, each task has its own task-specific source, denoted as  $\mathbf{x}_s^t$  for the  $s$ -th source in the  $t$ -th task. Specifically,  $\mathbf{x}_0^t$  represents the anchoring source observed in the  $t$ -th task, and  $\mathbf{x}_t^t$  denotes the task-specific source for the  $t$ -th task, while  $\{\mathbf{x}_s^t\}_{s \neq 0,t}$  are missing. For the  $t$ -th task, we observe  $n_t$  samples  $\{[\mathbf{x}_{0,i}^t|\mathbf{x}_{t,i}^t], y_i^t\}_{i=1}^{n_t}$ . This block-wise missing pattern is common in real-world applications. For example, in biomedical data, some measurements (data sources) are widely observed for all subjects, while some measurements are only collected to a subgroup of subjects due to various reasons. Concretely, in the ADNI data that we analyzed in Section 4.3, MRI is crucial to monitor the cognitive impairment development of Alzheimer’s patients, so it is measured for all subjects, while gene expression and PET images are less crucial and are only observed for two subgroups separately. Another example is the split questionnaire design, which aims to reduce respondent fatigue and improve response rates by assigning different subsets of the questionnaire to different sampled respondents (Lin et al., 2023). In Figure 1, we provide an example of a block-wise missing pattern for 4 tasks and 5 sources, where the blue source  $\mathbf{x}_0^t$  for  $t \in [4]$  represents the anchoring source observed by all four tasks, and each task also has a uniquely observed specific source  $\mathbf{x}_t^t$  for  $t \in [4]$ . Our goal is to perform MTL on these tasks with block-wise missing data.

| Anchor           | Specific Sources |                  |                  |                  | Response |
|------------------|------------------|------------------|------------------|------------------|----------|
| $\mathbf{x}_0^1$ | $\mathbf{x}_1^1$ |                  |                  |                  | $y^1$    |
| $\mathbf{x}_0^2$ |                  | $\mathbf{x}_2^2$ |                  |                  | $y^2$    |
| $\mathbf{x}_0^3$ |                  |                  | $\mathbf{x}_3^3$ |                  | $y^3$    |
| $\mathbf{x}_0^4$ |                  |                  |                  | $\mathbf{x}_4^4$ | $y^4$    |

Figure 1: Block-wise missing pattern for 4 tasks and 5 sources, including an anchoring source and task-specific sources.

Figure 1 illustrates one of the challenges in MTL. Each task has different missing blocks; for example, in the first task, sources 2, 3, and 4 are missing, while in the second task, sources 1, 3, and 4 are missing. Furthermore, both distribution and posterior heterogeneity across tasks complicate the application of standard imputation methods (Nair et al., 2019; He et al., 2024a;b) and MTL methods (Kouw & Loog, 2018; Lee et al., 2024; Maity et al., 2024).

### 3.1 HETEROGENEOUS BLOCK-WISE IMPUTATION

In this section, we propose the first step, Heterogeneous Block-wise Imputation (HBI) for imputing the missing blocks while leveraging distribution heterogeneity across tasks. HBI extracts disentangled hidden representations from the anchoring source  $x_0$ , including a shared representation across tasks and a task-specific representation for each task. The shared representation is then used to impute the missing blocks, improving generalization across tasks.

For  $T$  tasks and  $T + 1$  sources, we impute the task-specific sources in a parallel fashion. For each task-specific source  $s \neq 0$ , we utilize the anchoring source across all tasks and  $x_s^s$  to impute the unobserved blocks  $\{x_s^t\}_{t \neq s}$ . In particular, for the  $t$ -th source, only the  $t$ -th task has observed values for the features  $x_t^t$ . The imputation aims to use the observed  $x_0^t$  and  $x_t^t$  along with  $x_0^{-t} = \{x_0^r\}_{r \neq t}$  to estimate the missing features in the  $t$ -th source for the other  $T - 1$  tasks, where  $x_t^{-t} = \{x_t^r\}_{r \neq t}$  are unobserved. For example, in Figure 2, we use information from  $x_0^1$ ,  $x_1^1$ , and  $x_0^{-1} = \{x_0^2, x_0^3, x_0^4\}$  to impute the missing blocks  $x_1^{-1} = \{x_1^2, x_1^3, x_1^4\}$  for the task 1-specific source.

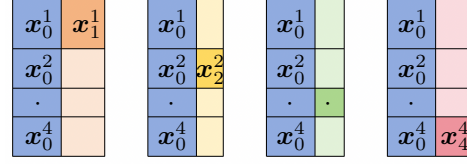

Figure 2: Illustration of parallel imputation for task-specific sources.

This is accomplished by learning a model that exploits both the shared and task-specific information of the data, allowing for accurate prediction of missing values based on the available observed data. To fully integrate multi-source information, we leverage an encoder-decoder framework, which is well-suited for capturing non-linear relationships in data. Let  $E_c(\cdot)$  be a common encoder that maps  $\{x_0^t, x_0^{-t}\}$  to shared representations  $f_c^t = E_c(x_0^t)$  and  $f_c^{-t} = E_c(x_0^{-t})$  across all  $T$  tasks. Let  $E_p^t(\cdot)$  and  $E_p^{-t}(\cdot)$  be task-specific encoders that map  $x_0^t$  and  $x_0^{-t}$  to task-specific representations  $g^t = E_p^t(x_0^t)$  and  $g^{-t} = E_p^{-t}(x_0^{-t})$ . Then,  $D(f, g)$  serves as a decoder that reconstructs the anchoring source  $x_0$  from  $f$  and  $g$ . Finally,  $G(f)$  is a predictor that maps the shared representation  $f$  to the task  $t$ -specific source  $x_t$ . The resulting heterogeneous block-wise imputation model is illustrated in Figure 3.

In Figure 3, we assume that the relationship between the anchoring source  $x_0$  and the task  $t$ -specific source  $x_t$  can be borrowed through the shared representations  $f$ , the common encoder  $E_c(\cdot)$ , and the decoder  $G(\cdot)$ . This allows us to utilize the shared information (reflected in  $f^t$  and  $f^{-t}$ ) for imputation, while also accounting for the heterogeneity between  $x_0^t$  and  $x_0^{-t}$  (reflected in  $g^t$  and  $g^{-t}$ ). Existing imputation methods often learn the relationship between  $x_0$  and  $x_t$  within the  $t$ -th task and apply the relationship to other tasks, overlooking distribution heterogeneity (Xue et al., 2021; Zhou et al., 2021). Moreover, common imputation methods rely on parametric models which fail to capture complex re-

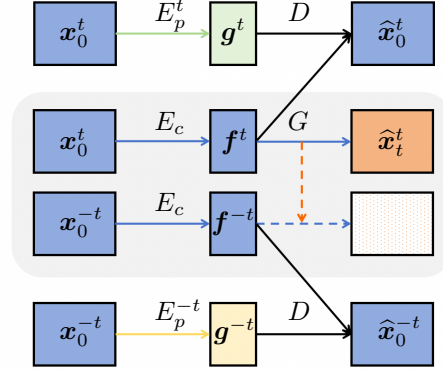

Figure 3: Illustration of HBI for the task  $t$ -specific source  $x_t$ . A common encoder  $E_c(\cdot)$  learns to capture representation components that are shared among tasks. Task-specific encoders  $E_p(\cdot)$  (one for the  $t$ -th task, and one for the other  $T - 1$  tasks) learn to capture task-specific components of the representations. A decoder learns to reconstruct the anchoring source  $x_0$  by using both shared and task-specific representations. The shared part of the relationship between the anchoring source  $x_0$  and the task  $t$ -specific source  $x_t$  can be borrowed through  $E_c(\cdot)$  and  $G(\cdot)$  for imputation. See the text for more information.

relationships in missing data (Xue & Qu, 2021; Li et al., 2023). However, our HBI method effectively overcomes these obstacles. Notably, HBI’s extraction of the common components in the relationships between sources across different tasks shares similarities with domain adaptation (Mansour et al., 2008; Bousmalis et al., 2016; Tzeng et al., 2017; Farahani et al., 2021) but focuses on completing block-wise missing data. This architecture effectively models complex data structures and interactions, providing a robust tool for understanding intricate patterns. The resulting optimization can be formulated as:

$$(\hat{E}_c(\cdot), \hat{E}_p^t(\cdot), \hat{E}_p^{-t}(\cdot), \hat{D}(\cdot), \hat{G}(\cdot)) = \arg \min \mathcal{L}_{\text{pre}} + \mathcal{L}_{\text{recon}}, \quad (1)$$

In (1), the prediction loss  $\mathcal{L}_{\text{pre}}$  trains the model to predict  $\mathbf{x}_t^t$ , the target of interest, which is applied only to the  $t$ -th task. We use the following loss function:

$$\mathcal{L}_{\text{pre}} = \sum_{i=1}^{n_t} l(\mathbf{x}_{t,i}^t, G(E_c(\mathbf{x}_{0,i}^t))),$$

where  $\mathbf{x}_i$  denotes the observed sample, and  $l(\cdot, \cdot)$  can be the mean squared error for continuous outcomes or cross-entropy for binary outcomes (this applies similarly to the following symbols). For the reconstruction loss in (1),

$$\mathcal{L}_{\text{recon}} = \sum_{i=1}^{n_t} l(\mathbf{x}_{0,i}^t, D(E_c(\mathbf{x}_{0,i}^t), E_p^t(\mathbf{x}_{0,i}^t))) + \sum_{i=1}^{n_{-t}} l(\mathbf{x}_{0,i}^{-t}, D(E_c(\mathbf{x}_{0,i}^{-t}), E_p^{-t}(\mathbf{x}_{0,i}^{-t}))),$$

where  $n_{-t} = \sum_{r \neq t} n_r$ . Then, we can train (1) to obtain the estimators  $\hat{E}_c(\cdot)$  and  $\hat{G}(\cdot)$ . Consequently, we compute  $\hat{\mathbf{x}}_t^{-t} = \hat{G}(\hat{E}_c(\mathbf{x}_0^{-t}))$ . Note that (1) is constructed based on task  $t$ -specific source imputation. Similarly, we can construct imputations for the other  $T - 1$  sources. When performing imputation for different sources using HBI, the learned hidden representations and corresponding generative functions adapt dynamically. This adaptation is crucial as it allows the model to accommodate the unique information of each source. The complete algorithm for parallel heterogeneous imputation is provided in Appendix A.4.

Our proposed HBI method ensures that the imputation model leverages common information across tasks while incorporating the heterogeneity of each task. By decomposing the latent space into shared and task-specific components, we gain a nuanced understanding of how input features from different sources interact, thereby enhancing imputation accuracy.

### 3.2 HETEROGENEOUS MULTI-TASK LEARNING

In this section, we propose our MTL framework to accommodate distribution and posterior heterogeneity given the imputed blocks from HBI. Similar to the disentangled representations for features, we also model the association between features and responses as two components: a shared function mapping and a task-specific function mapping. Specifically, for the  $t$ -th task, we assume that the relationship between the response  $y^t$  and the features  $[\mathbf{x}_0^t | \mathbf{x}_1^t | \dots | \mathbf{x}_T^t]$  is given by:

$$y^t = \psi_c([\mathbf{x}_0^t | \mathbf{x}_1^t | \dots | \mathbf{x}_T^t]) + \psi_p^t([\mathbf{x}_0^t | \mathbf{x}_1^t | \dots | \mathbf{x}_T^t]), \quad (2)$$

where  $[\mathbf{x}_0^t | \mathbf{x}_1^t | \dots | \mathbf{x}_T^t]$  influence  $y^t$  through a shared mapping  $\psi_c(\cdot)$  and a task-specific mapping  $\psi_p^t(\cdot)$ . Equation 2 extends traditional meta-analysis, which often assumes a linear relationship in the  $t$ -th task as  $y^t = [\mathbf{x}_0^t | \mathbf{x}_1^t | \dots | \mathbf{x}_T^t]^\top \beta^t + \varepsilon$ , where  $\beta^t$  includes a common component  $\mu$  shared across all  $T$  tasks and a unique component  $\alpha^t$  for each task (Chen et al., 2021; Cai et al., 2022; Maity et al., 2022). Traditional meta-analysis is incapable of accommodating non-linear relationships or varying effects. In contrast, we propose a flexible framework which accommodates non-linearities and integrates task-specific information.

To construct the shared mapping  $\psi_c(\cdot)$  and the task-specific mappings  $\{\psi_p^t\}_{t=1}^T$  jointly, we consider an MTL architecture comprising two parts. The first part builds heterogeneous feature spaces, while the second part learns responses for all  $T$  tasks. Specifically, for the  $t$ -th task, following HBI in Section 3.1, we obtain samples with reconstructed features  $\{(\mathbf{x}_{0,i}^t, \dots, \hat{\mathbf{x}}_{t-1,i}^t, \mathbf{x}_{t,i}^t, \hat{\mathbf{x}}_{t+1,i}^t, \dots, \hat{\mathbf{x}}_{T,i}^t), y_i^t\}_{i=1}^{n_t}$ . These features can then be integrated to capture both shared and task-specific representations, enabling the utilization of the combined data while addressing task-specific heterogeneity. During HBI, the components  $\{\hat{\mathbf{x}}_s^t\}_{s \neq 0,t}$  are primarily predicted

using the anchoring source  $\mathbf{x}_0^t$ , indicating that  $\mathbf{x}_0^t$  serves as a common basis. To prevent redundancy, we extract shared representations solely from the anchoring source  $\mathbf{x}_0^t$ . Specifically, we define

$$\mathbf{h}^t = \phi_c(\mathbf{x}_0^t), \quad (3)$$

where  $\phi_c(\cdot)$  is a shared encoder that learns hidden information from the anchoring source for all tasks. Meanwhile, task heterogeneity is captured by extracting representations from all features, creating a framework in which shared representations provide a common foundation, while task-specific details can still be preserved. For the  $t$ -th task, we define:

$$\mathbf{k}^t = \phi_p^t([\mathbf{x}_0^t | \cdots | \hat{\mathbf{x}}_{t-1}^t | \mathbf{x}_t^t | \hat{\mathbf{x}}_{t+1}^t | \cdots | \hat{\mathbf{x}}_T^t]), \quad (4)$$

where  $\phi_p^t$  is a task-specific encoder which maps the unique information within the  $t$ -th task. In (3) and (4), the heterogeneous feature spaces are fully captured using all data information. The task-specific representations  $\mathbf{k}$  capture complex interactions between different sources unique to each task, aided by HBI in Section 3.1. In practice, such interactions are crucial. For example, in the ADNI dataset, there are intricate relationships between images and gene expression. Equation 4 accounts for this heterogeneous information. However, previous work (Moon & Carbonell, 2017; Bica & van der Schaar, 2022) often oversimplifies these interactions by focusing only on task-specific sources, neglecting a wealth of shared information from other tasks.

For the second part, we consider a network architecture for learning responses in all  $T$  tasks, consisting of  $L$  layers with both shared and task-specific subspaces (Ruder et al., 2019; Curth & Van der Schaar, 2021; Bica & van der Schaar, 2022). For simplicity, in the  $t$ -th task, let  $\mathbf{k}_l^t$  and  $\mathbf{h}_l^t$  represent the inputs, and  $\mathbf{k}_l^t$  and  $\mathbf{h}_l^t$  the outputs of the  $l$ -th layer. For  $l = 1$ , set  $\mathbf{k}_1^t = [\mathbf{h}^t | \mathbf{k}^t]$  and  $\mathbf{h}_1^t = \mathbf{k}_1^t$ . For  $l > 1$ , the inputs to the  $(l + 1)$ -th layer are given by  $\mathbf{k}_{l+1}^t = [\mathbf{h}_l^t | \mathbf{k}_l^t]$  and  $\mathbf{h}_{l+1}^t = [\mathbf{h}_l^t]$ . Let  $g^t(\cdot)$  be the association function in the  $t$ -th task, defined as  $g^t([\mathbf{h}_L^t | \mathbf{k}_L^t]) = \psi_c([\mathbf{x}_0^t | \mathbf{x}_1^t | \cdots | \mathbf{x}_T^t]) + \psi_p^t([\mathbf{x}_0^t | \mathbf{x}_1^t | \cdots | \mathbf{x}_T^t])$ , where  $g^t(\cdot)$  is a linear function for continuous outcomes and a sigmoid function for binary ones.

Figure 4 illustrates the construction of the shared mapping  $\psi_c(\cdot)$  and the task-specific mappings  $\psi_p^1(\cdot)$  and  $\psi_p^2(\cdot)$  for two tasks. For task 1, the input features consist of  $[\mathbf{x}_0^1 | \mathbf{x}_1^1 | \hat{\mathbf{x}}_2^1]$ , where  $\hat{\mathbf{x}}_2^1$  represents the imputed source. In the first part, we build the heterogeneous feature space by extracting the shared representation  $\mathbf{h}^1 = \phi_c(\mathbf{x}_0^1)$  and the task-specific representation  $\mathbf{k}^1 = \phi_p^1([\mathbf{x}_0^1 | \mathbf{x}_1^1 | \hat{\mathbf{x}}_2^1])$ . Similarly, for task 2, we extract  $\mathbf{h}^2 = \phi_c(\mathbf{x}_0^2)$  and  $\mathbf{k}^2 = \phi_p^2([\mathbf{x}_0^2 | \hat{\mathbf{x}}_1^2 | \mathbf{x}_2^2])$ . Next, we utilize the pairs  $\{\mathbf{h}^1, \mathbf{k}^1\}$  and  $\{\mathbf{h}^2, \mathbf{k}^2\}$  to model the responses  $y^1$  and  $y^2$ , respectively. In Figure 4, the blue mapping illustrates the shared mapping  $\psi_c(\cdot)$ , while the orange and yellow mappings represent the task-specific mappings  $\psi_p^1(\cdot)$  and  $\psi_p^2(\cdot)$  for tasks 1 and 2, respectively.

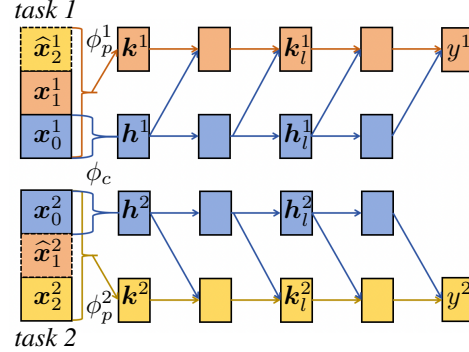

Figure 4: Illustration of the construction of shared mapping and task-specific mappings for two tasks.

The above construction allows us to define the following integrated loss across all  $T$  tasks:

$$\mathcal{L}_{\text{integ}} = \sum_{t=1}^T \sum_{i=1}^{n_t} l(y_i^t, g^t([\mathbf{h}_{L,i}^t | \mathbf{k}_{L,i}^t])). \quad (5)$$

Similar to Bousmalis et al. (2016), we also incorporate an orthogonality regularizer, defined as:

$$\mathcal{R}_{\text{orth}} = \sum_{t=1}^T \|(\mathbf{H}^t)^\top \mathbf{K}^t\|_F^2, \quad (6)$$

where  $\mathbf{H}^t$  and  $\mathbf{K}^t$  are matrices whose rows are the hidden representations  $\mathbf{h}^t$  and  $\mathbf{k}^t$ , respectively. Furthermore, in (4), the input is  $[\mathbf{x}_0^t | \cdots | \hat{\mathbf{x}}_{t-1}^t | \mathbf{x}_t^t | \hat{\mathbf{x}}_{t+1}^t | \cdots | \hat{\mathbf{x}}_T^t]$ , where  $\mathbf{x}_0^t$  and  $\mathbf{x}_t^t$  are the observed data, and  $\{\hat{\mathbf{x}}_s^t\}_{s \neq 0, t}$  are obtained through imputation. Since imputation can introduce errors, we also downweight the imputed data  $\{\hat{\mathbf{x}}_s^t\}_{s \neq 0, t}$  compared to observed data for learning  $\mathbf{k}^t$  by

applying a regularizer to the parameters of the first layer of the encoder  $\phi_p^t(\cdot)$ , defined as:

$$\mathcal{R}_{\text{imp}} = \sum_{t=1}^T \sum_{s \neq 0, t} \|\Theta_{s,p,1}^t\|_F^2, \quad (7)$$

where  $\Theta_{s,p,1}^t$  are the parameters of the first layer of  $\phi_p^t(\cdot)$  corresponding to  $\{\hat{x}_s^t\}_{s \neq 0, t}$ . This regularizer downweights potentially less accurate imputed features by penalizing the magnitude of the encoder parameters, fostering a model more robust to imputation errors. To further reduce redundancy between the shared and task-specific layers, we introduce an orthogonal regularizer (Ruder et al., 2019; Bica & van der Schaar, 2022). Let  $d_{c,l-1}^t$  and  $d_{p,l-1}^t$  be the dimensions of  $\mathbf{h}_{l-1}^t$  and  $\mathbf{k}_{l-1}^t$ , the outputs of the  $(l-1)$ -th layer. Denote the weights in the  $l$ -th layer as  $\Theta_{c,l}^t \in \mathbb{R}^{d_{c,l-1}^t \times d_{c,l}^t}$  and  $\Theta_{p,l}^t \in \mathbb{R}^{(d_{c,l-1}^t + d_{p,l-1}^t) \times d_{p,l}^t}$ . We apply the following regularizer:

$$\mathcal{R}_{\text{dr}} = \sum_{t=1}^T \sum_{l=1}^L \|(\Theta_{c,l}^t)^\top \Theta_{p,l,1:d_{c,l-1}^t}^t\|_F^2. \quad (8)$$

By combining the losses from (5), (6), (7), and (8), we train the set of all parameters  $\Theta$  using the following integrated loss function:

$$(\hat{\psi}_c, \{\hat{\psi}_p^t\}_{1 \leq t \leq T}) = \arg \min_{\Theta} \{\mathcal{L}_{\text{integ}} + \gamma \mathcal{R}_{\text{orth}} + \delta \mathcal{R}_{\text{imp}} + \kappa \mathcal{R}_{\text{dr}}\},$$

where  $\gamma$ ,  $\delta$ , and  $\kappa$  are weights controlling the balance among different terms. The more detailed algorithm for heterogeneous MTL is provided in Appendix A.4.

## 4 EXPERIMENTS

In this section, we conduct extensive numerical experiments, including two-task MTL, multi-task MTL with more than two tasks, and an application to the ADNI real dataset. The numerical experiments demonstrate that our proposed two-step MTL method effectively aggregates information in the presence of block-wise, distribution, and posterior heterogeneity.

### 4.1 MTL FOR TWO TASKS

We address a common real-world scenario involving MTL with two tasks for illustration. The data generation process (DGP) is as follows:

**DGP:** For Task 1, the features are denoted as  $\mathbf{x}^1 = [\mathbf{x}_0^1 | \mathbf{x}_1^1 | \mathbf{x}_2^1]$  and follow a Gaussian distribution with mean  $\mathbf{0}$  and an exchangeable covariance matrix. The variance is fixed at 1, and the covariance structure is specified as  $(\rho_1)^{0.01|i-j|}$ . We randomly generate  $n_1$  samples, with the third block  $\mathbf{x}_2^1$  missing in Task 1. For Task 2, the features are denoted as  $\mathbf{x}^2 = [\mathbf{x}_0^2 | \mathbf{x}_1^2 | \mathbf{x}_2^2]$ , where  $\mathbf{x}^2$  follows a Gaussian distribution with mean  $\mathbf{0}$ , variance 1, and covariance structure  $(\rho_2)^{0.01|i-j|}$ . In this task, we generate  $n_2$  samples, with the second block  $\mathbf{x}_1^2$  missing. The responses are defined as:

$$y^1 = \alpha \sum_{d=1}^p v_{c,d} (x_d^1)^2 / p + (1 - \alpha) \sum_{d=1}^p v_{1,d} x_d^1 / p + \varepsilon_1,$$

$$y^2 = \alpha \sum_{d=1}^p v_{c,d} (x_d^2)^2 / p + (1 - \alpha) \sum_{d=1}^p v_{2,d} x_d^2 / p + \varepsilon_2,$$

where  $p = \sum_{s=0}^2 p_s$ , with  $p_s$  being the dimension of the  $s$ -th source, and the subscript  $d$  denotes the  $d$ -th element of a vector (this notation applies to subsequent symbols as well). The parameters  $v_c$ ,  $v_1$ , and  $v_2$  are sampled from  $N(-10, 10^2)$ , and the noise terms  $\varepsilon_1 \sim N(0, \sigma_1^2)$  and  $\varepsilon_2 \sim N(0, \sigma_2^2)$ . The parameter  $\alpha$  controls the level of sharing across tasks. For evaluation, we calculate the average root-mean-squared error (RMSE) on the testing data, as defined in Appendix A.2. We conduct experiments under various settings to compare the proposed MTL for heterogeneous multi-source block-wise missing data (MTL-HMB) against existing methods, including Single Task Learning (STL) and Transfer Learning for Heterogeneous Data (HTL) (Bica & van der Schaar, 2022).



**Setting A: Effect of covariance parameters.** We set  $n_1 = n_2 = 300$ ,  $p_0 = 100$ ,  $p_1 = p_2 = 25$ ,  $\alpha = 0.3$ , and  $\sigma_1 = \sigma_2 = 0.1$ . To examine the impact of the covariance parameters  $\rho_1$  and  $\rho_2$ , we set  $\rho_1 = \rho_2$  and vary them from 0.5 to 0.95, assuming no distribution heterogeneity across datasets. As shown in Figure 5(a), increasing correlation improves prediction accuracy across all methods. The proposed MTL-HMB is the best performer. Specifically, at  $\rho = 0.95$ , it outperforms the others by more than 28.33 %. Even at  $\rho = 0.5$ , despite imputation errors, our method maintains an advantage. This demonstrates that imputation enhances prediction, especially when distribution heterogeneity is absent.

**Setting B: Effect of heterogeneous covariance parameters.** We set  $n_1 = n_2 = 300$ ,  $p_0 = 100$ ,  $p_1 = p_2 = 25$ ,  $\alpha = 0.3$ , and  $\sigma_1 = \sigma_2 = 0.1$ . To assess the impact of heterogeneous covariance, we fix  $\rho_1 = 0.95$  and vary  $\rho_2$  from 0.5 to 0.9. Smaller  $\rho_2$  indicates greater heterogeneity and weaker correlations in Task 2, making predictions more challenging. Figure 5(b) shows that as  $\rho_2$  increases, all methods improve, and our approach consistently leads. At the highest level of heterogeneity, MTL-HMB outperforms HTL by over 20.91 %. Moreover, HTL shows no advantage over STL, indicating that transfer learning struggles with distribution heterogeneity. In contrast, the proposed method effectively solves the heterogeneity challenge through imputation, achieving better predictive accuracy.

**Setting C: Effect of heterogeneous mappings.** We set  $n_1 = n_2 = 300$ ,  $p_1 = p_2 = 25$ ,  $\rho_1 = \rho_2 = 0.8$ , and  $\sigma_1 = \sigma_2 = 0.1$ . The parameter  $\alpha$  is varied to control the level of information sharing in the mappings to the response. A larger  $\alpha$  indicates more shared information. With  $\rho_1 = \rho_2$  fixed, heterogeneity is governed solely by  $\alpha$ . Figure 5(c) shows that as  $\alpha$  increases, the magnitude of  $y$  also increases, resulting in higher average RMSEs. Except at  $\alpha = 0.1$ , HTL consistently outperforms STL, indicating its advantage in incorporating posterior shift. Overall, the proposed MTL-HMB performs the best across all settings, even in the absence of distribution heterogeneity.

**Setting D: Effect of sample sizes.** We set  $p_1 = 100$ ,  $p_2 = 25$ ,  $p_3 = 25$ ,  $\rho_1 = 0.95$ ,  $\rho_2 = 0.7$ ,  $\alpha = 0.3$ , and  $\sigma_1 = \sigma_2 = 0.1$ . The sample sizes  $n_1$  and  $n_2$  vary as  $n_1 = n_2 = k \times 100$  for  $k = 1, \dots, 6$ . Figure 5(d) shows that as the sample size increases, average RMSEs decrease, and the corresponding variability of estimator is reduced across all methods. Our method consistently performs best, with an improvement of over 18.13 % compared to HTL. This is particularly notable at smaller sample sizes such as 100, where MTL-HMB outperforms HTL and STL by 37.13 % and 38.06 %, respectively. Additionally, HTL does not significantly outperform STL, indicating difficulty in handling distribution heterogeneity.

**Setting E: Effect of dimensions.** We set  $n_1 = n_2 = 300$ ,  $\rho_1 = 0.95$ ,  $\rho_2 = 0.7$ ,  $\alpha = 0.3$ , and  $\sigma_1 = \sigma_2 = 0.1$ . To assess the impact of dimensions  $p_1$ ,  $p_2$ , and  $p_3$ , we fix  $p_1 = 100$  and vary  $p_2 = p_3 = k \times 25$  for  $k = 1, \dots, 4$ . Figure 5(e) shows that increasing dimensions make prediction more challenging, leading to higher average RMSEs for all methods. Our method consistently outperforms the others, with at least 7.88 % and 10.73 % improvements over HTL and STL, respectively. Moreover, it exhibits greater stability, reflected by lower RMSEs at both the 75th and 25th percentiles.

**Setting F: Effect of heterogeneous noise levels.** We set  $n_1 = n_2 = 300$ ,  $p_1 = p_2 = 25$ ,  $\rho_1 = 0.95$ ,  $\rho_2 = 0.7$ , and  $\sigma_1 = \sigma_2 = 0.1$ . By fixing  $\sigma_2 = 0.1$  and varying  $\sigma_1$  from 0.1 to 0.5, we assess the impact of different noise levels. Figure 5(f) shows that HTL lacks a clear advantage over STL, indicating that distribution heterogeneity leads to degenerated HTL’s performance. Our MTL-HMB consistently outperforms the competing methods, demonstrating robustness in addressing both distribution and posterior heterogeneity. Furthermore, MTL-HMB excels at lower prediction levels, with neither STL nor HTL matching its performance at the 25th percentile.

## 4.2 MTL FOR MULTIPLE TASKS

To save space, the DGP for number of tasks greater than 2 is detailed in Appendix A.2. We select  $R = 2$ ,  $R = 3$ , and  $R = 4$ , with the prediction results summarized in Figure 6. As shown in Figure 6(a), increasing the number of heterogeneous tasks makes prediction more challenging, resulting in higher average RMSEs. This underscores the complexity of integrating diverse data. Nevertheless, our MTL-HMB consistently outperforms the other methods and shows the smallest RMSE standard deviation, indicating greater robustness and reliability. We focus on the first task, considering it the “easiest” due to the highest observed correlations. Figure 6(b) shows that for this “easy” task, as



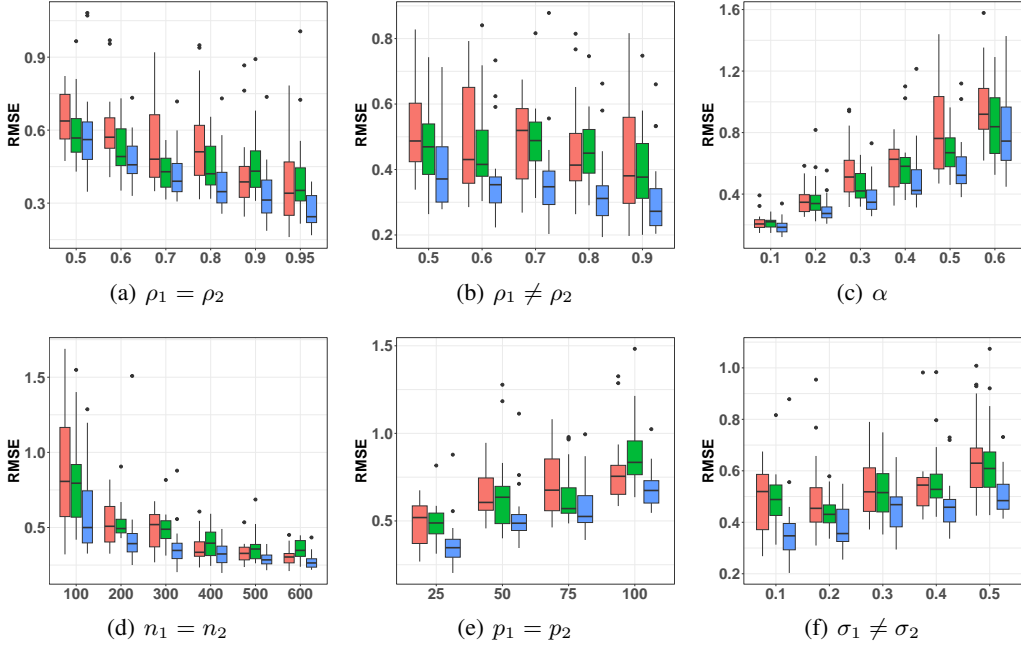

Figure 5: Boxplots of average RMSEs under **Settings A to F** for the three methods. The methods are distinguished by color: **orange** for STL, **green** for HTL, and **blue** for the proposed MTL-HMB.

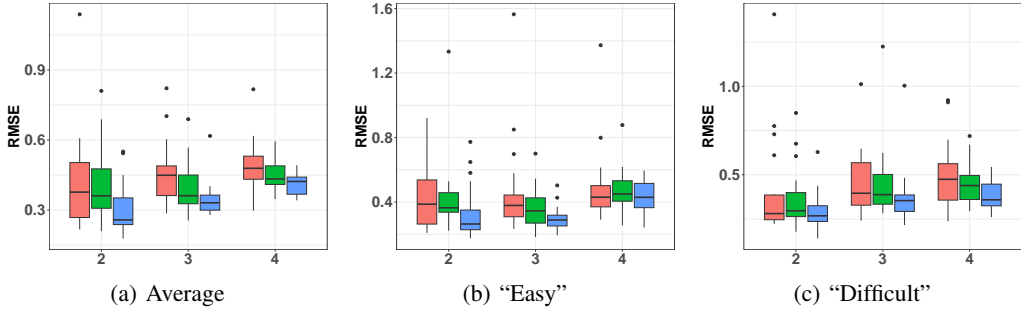

Figure 6: Boxplots of average RMSEs under multiple settings across three methods. The methods are differentiated by color: **orange** for STL, **green** for HTL, and **blue** for our proposed MTL-HMB.

more tasks are integrated, the improvement of our method decreases due to increasing heterogeneity. Additionally, we observe that in two-task learning, the second task is the most challenging; in three-task learning, it is the third task; and in four-task learning, it is the fourth task. This pattern indicates that as the number of integrated tasks increases, the complexity of learning escalates, particularly for the most recently added task. To quantify these challenges, we compile the RMSEs for the most difficult tasks in Figure 6(c), which shows that our MTL-HMB excels in these challenging tasks, consistently outperforming the other methods. For example, in the four-task integration, our method achieves over 18.22% improvement compared to the HTL.

### 4.3 ADNI REAL DATA APPLICATION

We perform MTL using the ADNI database. The first task has 72 samples with features from MRI and PET sources, denoted as  $\mathbf{X}_0^1$  and  $\mathbf{X}_1^1$ . The second task has 69 samples with features from MRI and GENE sources, denoted as  $\mathbf{X}_0^2$  and  $\mathbf{X}_2^2$ . The MRI source includes 267 features, PET includes 113, and GENE includes 300. For the response variable, we use the Mini-Mental State Examination

(MMSE), which measures cognitive impairment and serves as a diagnostic indicator of Alzheimer’s disease (Tombaugh & McIntyre, 1992).

Although both tasks share the MRI source, significant heterogeneity may still exist between the two datasets. To quantitatively assess this heterogeneity, we calculate the Maximum Mean Discrepancy (MMD) distance between  $\mathbf{X}_0^1$  and  $\mathbf{X}_0^2$ . Additionally, a permutation test is conducted to determine whether the differences between these sample sets are statistically significant. The test yields a  $p$ -value of  $1 \times 10^{-6}$ , indicating significant differences between  $\mathbf{X}_0^1$  and  $\mathbf{X}_0^2$  and therefore a necessity of incorporating heterogeneity among homogeneous source in MTL. Furthermore, the small sample sizes in both tasks impose challenges for prediction, where MTL can potentially enhance performance. For both datasets, we use 60% of the samples for training, 20% for model selection and early stopping, and calculate RMSE on the remaining 20% for testing. The experiment is repeated 30 times, and the results are summarized in Table 1. Our MTL-HMB yields lower prediction errors in both tasks, particularly in Task 2, where it improves performance by at least 17.28% compared to the other two methods, despite the small sample sizes. HTL performs worse than STL due to ignoring the significant heterogeneity between  $\mathbf{X}_0^1$  and  $\mathbf{X}_0^2$ .

| Method      | Task 1            | Task 2            |
|-------------|-------------------|-------------------|
| STL         | 2.74(0.87)        | 4.57(1.15)        |
| HTL         | 2.86(0.75)        | 4.34(1.47)        |
| <b>Ours</b> | <b>2.66(0.59)</b> | <b>3.59(0.98)</b> |

Table 1: Prediction accuracy on testing data, measured by RMSE.

## 5 DISCUSSION

In this paper, we propose a novel two-step strategy for effective MTL in the context of block-wise missing data in conjunction with different types of heterogeneity. The first step addresses distribution heterogeneity using integrated imputation, while the second step integrates learning to overcome distribution and posterior heterogeneity. We conduct extensive numerical experiments to validate the superiority of the proposed method across various levels of heterogeneity. Additionally, in the ADNI real-world dataset, our approach achieves significant improvements in both tasks. In the following, we provide the limitations and outline directions for future work, primarily focusing on transforming the two-step process into a single-step approach. In this unified method, the shared and task-specific hidden representations can be used for both imputing missing data and posterior learning simultaneously, as detailed in Appendix A.6.

## REFERENCES

- Milad Abdollahzadeh, Touba Malekzadeh, and Ngai-Man Man Cheung. Revisit multimodal meta-learning through the lens of multi-task learning. *Advances in Neural Information Processing Systems*, 34:14632–14644, 2021.
- Niccolo Anceschi, Federico Ferrari, David B Dunson, and Himel Mallick. Bayesian joint additive factor models for multiview learning. *arXiv preprint arXiv:2406.00778*, 2024.
- Ioana Bica and Mihaela van der Schaar. Transfer learning on heterogeneous feature spaces for treatment effects estimation. *Advances in Neural Information Processing Systems*, 35:37184–37198, 2022.
- Konstantinos Bousmalis, George Trigeorgis, Nathan Silberman, Dilip Krishnan, and Dumitru Erhan. Domain separation networks. *Advances in neural information processing systems*, 29, 2016.
- Tianxi Cai, Molei Liu, and Yin Xia. Individual data protected integrative regression analysis of high-dimensional heterogeneous data. *Journal of the American Statistical Association*, 117(540): 2105–2119, 2022.
- Kai Cao, Qiyu Gong, Yiguang Hong, and Lin Wan. A unified computational framework for single-cell data integration with optimal transport. *Nature Communications*, 13(1):7419, 2022a.
- Kai Cao, Yiguang Hong, and Lin Wan. Manifold alignment for heterogeneous single-cell multi-omics data integration using pamona. *Bioinformatics*, 38(1):211–219, 2022b.

- Arslan Chaudhry, Marc’Aurelio Ranzato, Marcus Rohrbach, and Mohamed Elhoseiny. Efficient lifelong learning with a-gem. *arXiv preprint arXiv:1812.00420*, 2018.
- Jingxiang Chen, Quoc Tran-Dinh, Michael R Kosorok, and Yufeng Liu. Identifying heterogeneous effect using latent supervised clustering with adaptive fusion. *Journal of Computational and Graphical Statistics*, 30(1):43–54, 2021.
- SeoWon Gabriel Choi and Sungkyu Jung. Integrative decomposition of multi-source data by identifying partially-joint score subspaces. *arXiv preprint arXiv:2203.14041*, 2022.
- Kevin Clark, Minh-Thang Luong, Urvashi Khandelwal, Christopher D Manning, and Quoc V Le. Bam! born-again multi-task networks for natural language understanding. *arXiv preprint arXiv:1907.04829*, 2019.
- Bénédicte Colnet, Imke Mayer, Guanhua Chen, Awa Dieng, Ruohong Li, Gaël Varoquaux, Jean-Philippe Vert, Julie Josse, and Shu Yang. Causal inference methods for combining randomized trials and observational studies: a review. *Statistical science*, 39(1):165–191, 2024.
- Michael Crawshaw. Multi-task learning with deep neural networks: A survey. *arXiv preprint arXiv:2009.09796*, 2020.
- Alicia Curth and Mihaela Van der Schaar. On inductive biases for heterogeneous treatment effect estimation. *Advances in Neural Information Processing Systems*, 34:15883–15894, 2021.
- Carlo D’Eramo, Davide Tateo, Andrea Bonarini, Marcello Restelli, and Jan Peters. Sharing knowledge in multi-task deep reinforcement learning. *arXiv preprint arXiv:2401.09561*, 2024.
- Yunshu Du, Wojciech M Czarnecki, Siddhant M Jayakumar, Mehrdad Farajtabar, Razvan Pascanu, and Balaji Lakshminarayanan. Adapting auxiliary losses using gradient similarity. *arXiv preprint arXiv:1812.02224*, 2018.
- Abolfazl Farahani, Sahar Voghoei, Khaled Rasheed, and Hamid R Arabnia. A brief review of domain adaptation. *Advances in data science and information engineering: proceedings from ICDATA 2020 and IKE 2020*, pp. 877–894, 2021.
- Qing Feng, Meilei Jiang, Jan Hannig, and JS Marron. Angle-based joint and individual variation explained. *Journal of multivariate analysis*, 166:241–265, 2018.
- Qi Gao and Thomas CM Lee. High-dimensional variable selection in regression and classification with missing data. *Signal Processing*, 131:1–7, 2017.
- Xing Gao, Sungwon Lee, Gen Li, and Sungkyu Jung. Covariate-driven factorization by thresholding for multiblock data. *Biometrics*, 77(3):1011–1023, 2021.
- Irina Gaynanova and Gen Li. Structural learning and integrative decomposition of multi-view data. *Biometrics*, 75(4):1121–1132, 2019.
- Ting Gong, Tyler Lee, Cory Stephenson, Venkata Renduchintala, Suchismita Padhy, Anthony Ndirango, Gokce Keskin, and Oguz H Elibol. A comparison of loss weighting strategies for multi task learning in deep neural networks. *IEEE Access*, 7:141627–141632, 2019.
- Zeyu Han, Chao Gao, Jinyang Liu, Sai Qian Zhang, et al. Parameter-efficient fine-tuning for large models: A comprehensive survey. *arXiv preprint arXiv:2403.14608*, 2024.
- Tiankai Hang, Shuyang Gu, Chen Li, Jianmin Bao, Dong Chen, Han Hu, Xin Geng, and Baining Guo. Efficient diffusion training via min-snr weighting strategy. In *Proceedings of the IEEE/CVF International Conference on Computer Vision*, pp. 7441–7451, 2023.
- Zelin He, Ying Sun, and Runze Li. Transfusion: Covariate-shift robust transfer learning for high-dimensional regression. In *International Conference on Artificial Intelligence and Statistics*, pp. 703–711. PMLR, 2024a.
- Zelin He, Ying Sun, Jingyuan Liu, and Runze Li. Adatrans: Feature-wise and sample-wise adaptive transfer learning for high-dimensional regression. *arXiv preprint arXiv:2403.13565*, 2024b.

- Ziniu Hu, Zhe Zhao, Xinyang Yi, Tiansheng Yao, Lichan Hong, Yizhou Sun, and Ed Chi. Improving multi-task generalization via regularizing spurious correlation. *Advances in Neural Information Processing Systems*, 35:11450–11466, 2022.
- Guido W Imbens and Donald B Rubin. *Causal inference in statistics, social, and biomedical sciences*. Cambridge university press, 2015.
- Carson James, Dongbang Yuan, Irina Gaynanova, and Jesús Arroyo. Learning joint and individual structure in network data with covariates. *arXiv preprint arXiv:2406.08776*, 2024.
- David M Kent, Ewout Steyerberg, and David Van Klaveren. Personalized evidence based medicine: predictive approaches to heterogeneous treatment effects. *Bmj*, 363, 2018.
- David M Kent, Jessica K Paulus, David Van Klaveren, Ralph D’Agostino, Steve Goodman, Rodney Hayward, John PA Ioannidis, Bray Patrick-Lake, Sally Morton, Michael Pencina, et al. The predictive approaches to treatment effect heterogeneity (path) statement. *Annals of internal medicine*, 172(1):35–45, 2020.
- Wouter M Kouw and Marco Loog. An introduction to domain adaptation and transfer learning. *arXiv preprint arXiv:1812.11806*, 2018.
- Hyungi Lee, Giung Nam, Edwin Fong, and Juho Lee. Enhancing transfer learning with flexible nonparametric posterior sampling. *arXiv preprint arXiv:2403.07282*, 2024.
- Jia-Hong Lee, Yi-Ming Chan, Ting-Yen Chen, and Chu-Song Chen. Joint estimation of age and gender from unconstrained face images using lightweight multi-task cnn for mobile applications. In *2018 IEEE conference on multimedia information processing and retrieval (MIPR)*, pp. 162–165. IEEE, 2018.
- Jingmao Li, Qingzhao Zhang, Song Chen, and Kuangnan Fang. Weighted multiple blockwise imputation method for high-dimensional regression with blockwise missing data. *Journal of Statistical Computation and Simulation*, 93(3):459–474, 2023.
- Quefeng Li and Lexin Li. Integrative factor regression and its inference for multimodal data analysis. *Journal of the American Statistical Association*, 117(540):2207–2221, 2022.
- Ting Li, Chengchun Shi, Qianglin Wen, Yang Sui, Yongli Qin, Chunbo Lai, and Hongtu Zhu. Combining experimental and historical data for policy evaluation. *arXiv preprint arXiv:2406.00317*, 2024a.
- Yiming Li, Xuehan Yang, Ying Wei, and Molei Liu. Adaptive and efficient learning with blockwise missing and semi-supervised data. *arXiv preprint arXiv:2405.18722*, 2024b.
- Cunjie Lin, Jingfu Peng, Yichen Qin, Yang Li, and Yuhong Yang. Optimal integrating learning for split questionnaire design type data. *Journal of Computational and Graphical Statistics*, 32(3):1009–1023, 2023.
- Xiaodong Liu, Pengcheng He, Weizhu Chen, and Jianfeng Gao. Multi-task deep neural networks for natural language understanding. In *Proceedings of the 57th Annual Meeting of the Association for Computational Linguistics*, pp. 4487–4496, 2019.
- Eric F Lock, Katherine A Hoadley, James Stephen Marron, and Andrew B Nobel. Joint and individual variation explained (jive) for integrated analysis of multiple data types. *The annals of applied statistics*, 7(1):523, 2013.
- David Lopez-Paz and Marc’Aurelio Ranzato. Gradient episodic memory for continual learning. *Advances in neural information processing systems*, 30, 2017.
- Jeanne M Madden, Matthew D Lakoma, Donna Rusinak, Christine Y Lu, and Stephen B Soumerai. Missing clinical and behavioral health data in a large electronic health record (ehr) system. *Journal of the American Medical Informatics Association*, 23(6):1143–1149, 2016.
- Subha Maity, Yuekai Sun, and Moulinath Banerjee. Meta-analysis of heterogeneous data: integrative sparse regression in high-dimensions. *Journal of Machine Learning Research*, 23(198):1–50, 2022.

- Subha Maity, Diptavo Dutta, Jonathan Terhorst, Yuekai Sun, and Moulinath Banerjee. A linear adjustment-based approach to posterior drift in transfer learning. *Biometrika*, 111(1):31–50, 2024.
- Kevis-Kokitsi Maninis, Ilija Radosavovic, and Iasonas Kokkinos. Attentive single-tasking of multiple tasks. In *Proceedings of the IEEE/CVF conference on computer vision and pattern recognition*, pp. 1851–1860, 2019.
- Yishay Mansour, Mehryar Mohri, and Afshin Rostamizadeh. Domain adaptation with multiple sources. *Advances in neural information processing systems*, 21, 2008.
- Łukasz Maziarka, Aleksandra Nowak, Maciej Wołczyk, and Andrzej Bedychaj. On the relationship between disentanglement and multi-task learning. In *Joint European Conference on Machine Learning and Knowledge Discovery in Databases*, pp. 625–641. Springer, 2022.
- Seungwhan Moon and Jaime G Carbonell. Completely heterogeneous transfer learning with attention-what and what not to transfer. In *IJCAI*, volume 1, pp. 1–2, 2017.
- Susanne G Mueller, Michael W Weiner, Leon J Thal, Ronald C Petersen, Clifford Jack, William Jagust, John Q Trojanowski, Arthur W Toga, and Laurel Beckett. The alzheimer’s disease neuroimaging initiative. *Neuroimaging Clinics of North America*, 15(4):869, 2005a.
- Susanne G Mueller, Michael W Weiner, Leon J Thal, Ronald C Petersen, Clifford R Jack, William Jagust, John Q Trojanowski, Arthur W Toga, and Laurel Beckett. Ways toward an early diagnosis in alzheimer’s disease: the alzheimer’s disease neuroimaging initiative (adni). *Alzheimer’s & Dementia*, 1(1):55–66, 2005b.
- Nimisha G Nair, Pallavi Satpathy, Jabez Christopher, et al. Covariate shift: A review and analysis on classifiers. In *2019 Global Conference for Advancement in Technology (GCAT)*, pp. 1–6. IEEE, 2019.
- Zhongzhe Ouyang, Lu Wang, and Alzheimer’s Disease Neuroimaging Initiative†. Imputation-based variable selection method for block-wise missing data when integrating multiple longitudinal studies. *Mathematics*, 12(7):951, 2024.
- Elise F Palzer, Christine H Wendt, Russell P Bowler, Craig P Hersh, Sandra E Safo, and Eric F Lock. sjive: Supervised joint and individual variation explained. *Computational statistics & data analysis*, 175:107547, 2022.
- Sebastian Ruder, Joachim Bingel, Isabelle Augenstein, and Anders Søgaard. Latent multi-task architecture learning. In *Proceedings of the AAAI conference on artificial intelligence*, volume 33, pp. 4822–4829, 2019.
- Andrei A Rusu, Sergio Gomez Colmenarejo, Caglar Gulcehre, Guillaume Desjardins, James Kirkpatrick, Razvan Pascanu, Volodymyr Mnih, Koray Kavukcuoglu, and Raia Hadsell. Policy distillation. *arXiv preprint arXiv:1511.06295*, 2015.
- Hai Shu, Xiao Wang, and Hongtu Zhu. D-cca: A decomposition-based canonical correlation analysis for high-dimensional datasets. *Journal of the American Statistical Association*, 115(529):292–306, 2020.
- Indhupriya Subramanian, Srikant Verma, Shiva Kumar, Abhay Jere, and Krishanpal Anamika. Multi-omics data integration, interpretation, and its application. *Bioinformatics and biology insights*, 14:1177932219899051, 2020.
- Sandeep Subramanian, Adam Trischler, Yoshua Bengio, and Christopher J Pal. Learning general purpose distributed sentence representations via large scale multi-task learning. In *International Conference on Learning Representations*, 2018.
- Yee Teh, Victor Bapst, Wojciech M Czarnecki, John Quan, James Kirkpatrick, Raia Hadsell, Nicolas Heess, and Razvan Pascanu. Distral: Robust multitask reinforcement learning. *Advances in neural information processing systems*, 30, 2017.
- Tom N Tombaugh and Nancy J McIntyre. The mini-mental state examination: a comprehensive review. *Journal of the American Geriatrics Society*, 40(9):922–935, 1992.

- Eric Tzeng, Judy Hoffman, Kate Saenko, and Trevor Darrell. Adversarial discriminative domain adaptation. In *Proceedings of the IEEE conference on computer vision and pattern recognition*, pp. 7167–7176, 2017.
- Karen Ullrich, Edward Meeds, and Max Welling. Soft weight-sharing for neural network compression. *arXiv preprint arXiv:1702.04008*, 2017.
- Jiuzhou Wang and Eric F Lock. Multiple augmented reduced rank regression for pan-cancer analysis. *Biometrics*, 80(1):ujad002, 2024.
- Liyuan Wang, Xingxing Zhang, Hang Su, and Jun Zhu. A comprehensive survey of continual learning: theory, method and application. *IEEE Transactions on Pattern Analysis and Machine Intelligence*, 2024.
- Huangyuan Wu, Bin Li, Lianfang Tian, Junjian Feng, and Chao Dong. An adaptive loss weighting multi-task network with attention-guide proposal generation for small size defect inspection. *The Visual Computer*, 40(2):681–698, 2024.
- Shuo Xiang, Lei Yuan, Wei Fan, Yalin Wang, Paul M Thompson, Jieping Ye, Alzheimer’s Disease Neuroimaging Initiative, et al. Bi-level multi-source learning for heterogeneous block-wise missing data. *NeuroImage*, 102:192–206, 2014.
- Fei Xue and Annie Qu. Integrating multisource block-wise missing data in model selection. *Journal of the American Statistical Association*, 116(536):1914–1927, 2021.
- Fei Xue, Rong Ma, and Hongzhe Li. Statistical inference for high-dimensional linear regression with blockwise missing data. *arXiv preprint arXiv:2106.03344*, 2021.
- Sangyoon Yi, Raymond Ka Wai Wong, and Irina Gaynanova. Hierarchical nuclear norm penalization for multi-view data integration. *Biometrics*, 79(4):2933–2946, 2023.
- Guan Yu, Quefeng Li, Dinggang Shen, and Yufeng Liu. Optimal sparse linear prediction for block-missing multi-modality data without imputation. *Journal of the American Statistical Association*, 115(531):1406–1419, 2020.
- Lei Yuan, Yalin Wang, Paul M Thompson, Vaibhav A Narayan, Jieping Ye, Alzheimer’s Disease Neuroimaging Initiative, et al. Multi-source feature learning for joint analysis of incomplete multiple heterogeneous neuroimaging data. *NeuroImage*, 61(3):622–632, 2012.
- Yu Zhang and Qiang Yang. An overview of multi-task learning. *National Science Review*, 5(1):30–43, 2018.
- Yu Zhang and Qiang Yang. A survey on multi-task learning. *IEEE transactions on knowledge and data engineering*, 34(12):5586–5609, 2021.
- Yunfeng Zhang and Irina Gaynanova. Joint association and classification analysis of multi-view data. *Biometrics*, 78(4):1614–1625, 2022.
- Doudou Zhou, Tianxi Cai, and Junwei Lu. Multi-source learning via completion of block-wise overlapping noisy matrices. *arXiv preprint arXiv:2105.10360*, 2021.
